# Supplementary material for: Immune Responses against the Omicron Variant of SARS-CoV-2 after a Third Dose of COVID-19 Vaccine in Patients Living with Human Immunodeficiency Virus (PLWH): Comparison with Healthcare Workers
Source: MDPI journal article supplement (doi:10.3390/vaccines10122129), 2022-12-13

**Supplementary Table S1. Clinical characteristics of vaccinated patients living with HIV and healthcare workers**

|                                     | PLWH ( <i>n</i> = 38)     | Healthcare workers<br>( <i>n</i> = 239) | <i>P</i> value |
|-------------------------------------|---------------------------|-----------------------------------------|----------------|
| Male, n (%)                         | 37 (97.4)                 | 85 (35.6)                               | <0.001         |
| Age, median (IQR)                   | 41 (32-55)                | 32 (25-44)                              | 0.001          |
| Vaccination history                 |                           |                                         |                |
| 2 <sup>nd</sup> dose                | 38 (100.0)                | 239 (100.0)                             | -              |
| 3 <sup>rd</sup> dose                | 30 (78.9)                 | 216 (90.4)                              | 0.04           |
| Vaccine regimen                     |                           |                                         | 0.02           |
| Homologous <sup>a</sup>             | 24 (63.2)                 | 116 (48.5)                              |                |
| mRNA                                | 23 (60.5)                 | 114 (47.7)                              |                |
| Adenovirus-vector                   | 1 (2.6)                   | 2 (0.8)                                 |                |
| Heterologous                        | 13 (34.2)                 | 123 (51.5)                              |                |
| Ad-Ad-mRNA                          | 9                         | 122                                     |                |
| Ad-mRNA-mRNA                        | 4                         | 1                                       |                |
| Unknown                             | 1 (2.6)                   | 0 (0)                                   |                |
| HIV status                          |                           |                                         |                |
| Duration after HIV diagnosis, years | 9.5 (5.0-13.0)            | -                                       |                |
| Duration after HIV treatment, years | 8.5 (5.0-12.0)            | -                                       |                |
| White blood cell, /μl               | 5,835 (5,035-7,035)       | -                                       |                |
| Lymphocytes, %                      | 36.6 (30.9-42.4)          | -                                       |                |
| CD4 lymphocytes                     | 586.3 (440.9-804.8)       | -                                       |                |
| <20 copies/ml of HIV RNA, n (%)     | 32/38 <sup>b</sup> (84.2) |                                         |                |
| Underlying diseases or conditions   | 7 (18.4)                  |                                         |                |
| Malignancy                          | 4 (10.5)                  | 0                                       | <0.001         |
| Chemotherapy                        | 1 (2.6)                   | 0                                       | 0.14           |

HIV, human immunodeficiency virus; PLWH, patient living with HIV; IQR, interquartile range

<sup>a</sup>Homologous vaccination with mRNA or adenovirus-vector (Ad) vaccine (e.g. mRNA-mRNA, mRNA-mRNA-mRNA, Ad-Ad, and Ad-Ad-Ad)

<sup>b</sup>Of the remaining six patients, four patients had less than 100 copies/ml, one patient had 1,190 copies/ml, and one patient had 1,140,000 copies/ml of HIV RNA

**Supplementary Table S2. Clinical characteristics of 22 vaccinated patients living with HIV and 22 age-sex matched healthcare workers**

|                                     | PLWH ( <i>n</i> = 22) | Healthcare workers<br>( <i>n</i> = 22) | <i>P</i> value |
|-------------------------------------|-----------------------|----------------------------------------|----------------|
| Male, n (%)                         | 21 (95.5)             | 21 (95.5)                              | >0.99          |
| Age, median (IQR)                   | 41 (31-54)            | 41 (31-51)                             | 0.95           |
| Vaccine regimen                     |                       |                                        | 0.13           |
| Homologous <sup>a</sup>             | 13 (59.1)             | 8 (36.4)                               |                |
| mRNA                                | 13                    | 13                                     |                |
| Adenovirus-vector                   | 0                     | 0                                      |                |
| Heterologous                        | 9 (40.9)              | 14 (63.6)                              |                |
| HIV status                          |                       |                                        |                |
| Duration after HIV diagnosis, years | 10.0 (6.8-13.0)       | -                                      | -              |
| Duration after HIV treatment, years | 8.5 (6.0-12.0)        | -                                      | -              |
| White blood cell, /μl               | 6,055 (5,020-7,485)   | -                                      | -              |
| Lymphocytes, %                      | 37.2 (30.5-44.7)      | -                                      | -              |
| CD4 lymphocytes                     | 655.6 (515.2-906.4)   | -                                      | -              |
| <20 copies/ml of HIV RNA, n (%)     | 18 (81.8)             | -                                      | -              |
| Underlying diseases or conditions   |                       |                                        |                |
| Malignancy                          | 2 (9.1)               | 0                                      | 0.49           |
| Chemotherapy                        | 1 (4.5)               | 0                                      | >0.99          |

HIV, human immunodeficiency virus; PLWH, patient living with HIV; IQR, interquartile range

<sup>a</sup>Homologous vaccination with mRNA or adenovirus-vector (Ad) vaccine (e.g. mRNA-mRNA, mRNA-mRNA-mRNA, Ad-Ad, and Ad-Ad-Ad)

**Supplementary Table S3. SARS-CoV-2 spike-specific immunoglobulin G, neutralizing antibody responses and T cell responses against wild type and omicron variant of SARS-CoV-2 in vaccinated patients living with HIV and healthcare workers**

|                                                                     | PLWH ( <i>n</i> = 38)  | Healthcare workers<br>( <i>n</i> = 239) | <i>P</i> value |
|---------------------------------------------------------------------|------------------------|-----------------------------------------|----------------|
| <b>After 2<sup>nd</sup> dose</b>                                    | n=14                   | n=224                                   |                |
| Duration between antibody test<br>and last vaccination, days        | 94 (72-116)            | 162 (148-164)                           | <0.001         |
| EUROIMMUN IgG                                                       |                        |                                         |                |
| Positive, n(%)                                                      | 14 (100.0)             | 218 (97.3)                              | >0.99          |
| Median value, IQR                                                   | 6.43 (4.61-7.47)       | 4.18 (2.54-5.69)                        | 0.001          |
| SVNT, wild type                                                     |                        |                                         |                |
| Positive, n (%)                                                     | 14 (100.0)             | 221 (98.7)                              | >0.99          |
| Median value, IQR                                                   | 97.28 (92.74-97.49)    | 88.36 (68.44-96.15)                     | 0.003          |
| SVNT, omicron variant                                               |                        |                                         |                |
| Positive, n (%)                                                     | 3 (21.4)               | 45/218 (20.6)                           | >0.99          |
| Median value, IQR                                                   | 14.50 (6.37-27.66)     | 21.15 (13.12-27.83)                     | 0.20           |
| Duration between T cell response<br>test and last vaccination, days | 90 (71.8-115.5)        | -                                       |                |
| IGRA                                                                |                        |                                         |                |
| Positive, n (%)                                                     | 5/6 (83.3)             | 4/43 (9.3)                              | <0.001         |
| Median value, IQR                                                   | 551.76 (226.29-935.63) | 52.95 (21.38-91.53)                     | <0.001         |
| <b>After 3<sup>rd</sup> dose</b>                                    | n=29                   | n=114                                   |                |
| Duration between antibody test<br>and last vaccination, days        | 63 (36-96)             | 63 (61-92)                              | 0.36           |
| EUROIMMUN IgG                                                       |                        |                                         |                |
| Positive, n (%)                                                     | 29 (100.0)             | 126 (100.0)                             | >0.99          |
| Median value, IQR                                                   | 5.25 (4.89-5.52)       | 7.14 (5.18-8.32)                        | 0.006          |
| SVNT, wild type                                                     |                        |                                         |                |
| Positive, n (%)                                                     | 29 (100.0)             | 126 (100.0)                             | >0.99          |
| Median value, IQR                                                   | 97.46 (96.92-97.84)    | 97.74 (97.53-98.25)                     | 0.005          |
| SVNT, omicron variant                                               |                        |                                         |                |
| Positive, n (%)                                                     | 18 (62.1)              | 78 (68.4)                               | 0.42           |
| Median value, IQR                                                   | 43.94 (18.75-74.55)    | 51.77 (23.17-71.20)                     | 0.69           |
| Duration between T cell response                                    | 65 (52-152)            | 64 (61-118)                             | 0.83           |

---

test and last vaccination, days

IGRA

|                   |                        |                        |      |
|-------------------|------------------------|------------------------|------|
| Positive, n (%)   | 6/9 (67.0)             | 56/76 (73.7)           | 0.20 |
| Median value, IQR | 434.84 (102.26-893.43) | 484.96 (177.00-669.63) | 0.90 |

---

HIV, human immunodeficiency virus; PLWH, patient living with HIV; IQR, interquartile range;  
SVNT, surrogate virus neutralization test; IGRA, interferon-gamma releasing assay

**Supplementary Figure S1. SARS-CoV-2 spike-specific immunoglobulin G (IgG) and neutralizing responses against wild type and omicron variant of SARS-CoV-2 at median 62 days after a third COVID-19 vaccination in 22 people living with HIV (PLWH) and 22 healthcare workers (HCWs) who were randomly selected by matching age and sex with PLWH.**

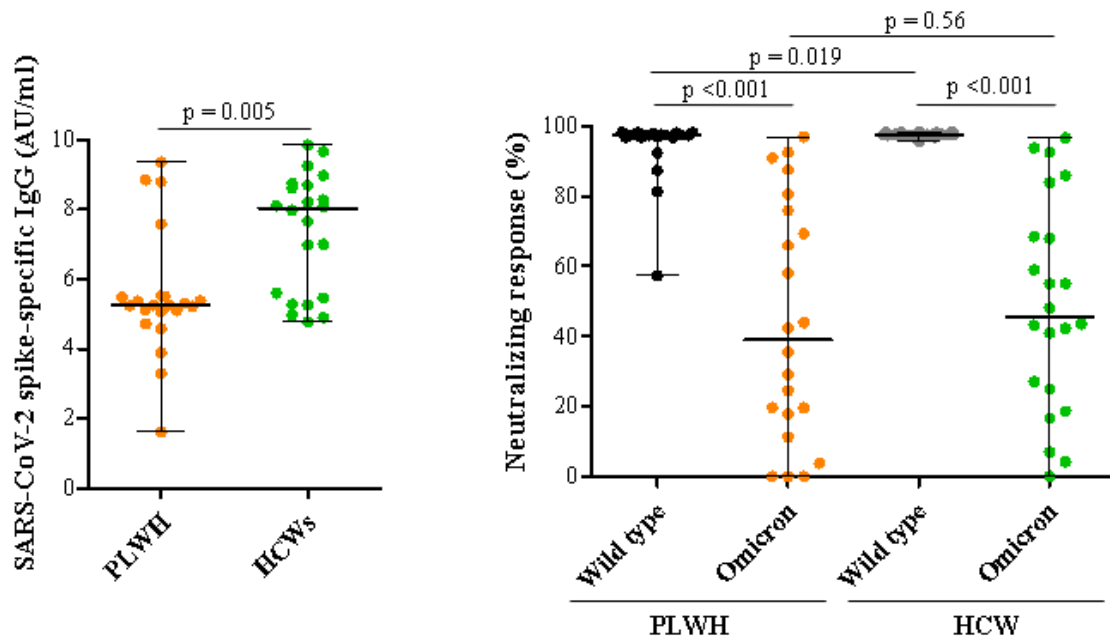

**Supplementary Figure S2. SARS-CoV-2 spike-specific immunoglobulin G (IgG) and neutralizing responses against wild type and omicron variant of SARS-CoV-2 after the second dose of COVID-19 vaccination in patients living with HIV (PLWH) and healthcare workers (HCWs)**

(A) SARS-CoV-2 spike specific IgG, (B) neutralizing responses against wild type and omicron variant

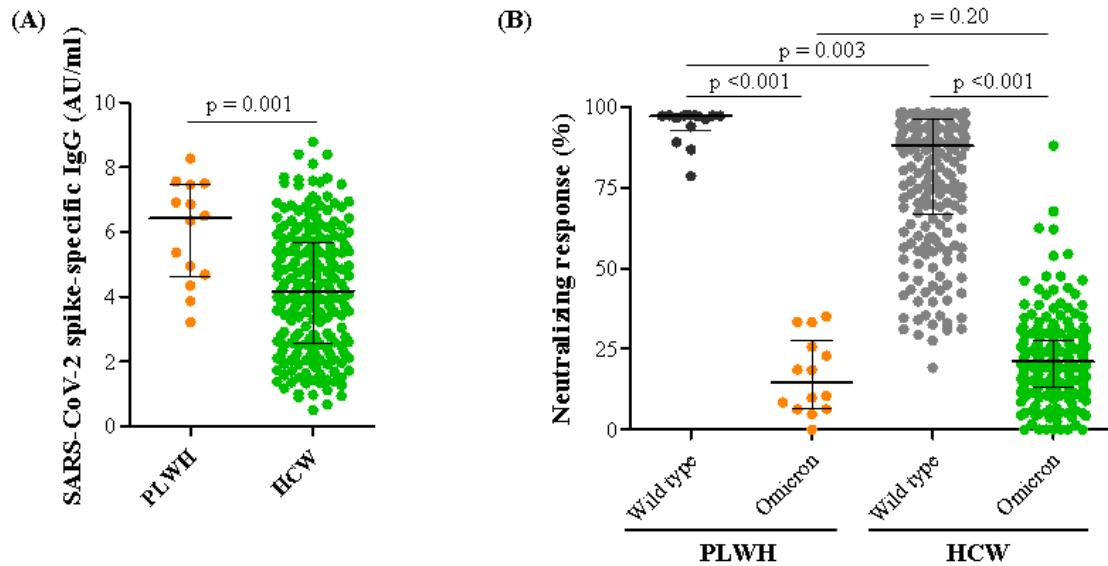

Supplement: s1 [file s1]
